# Supplementary material
Source: Research Square preprint supplement (doi:10.21203/rs.3.rs-9131402/v1)
Supplement: Supplementary file 1 [file 9133c25a8c6aafb968912815.docx]

| **Supplementary Table 1. Histological, molecular, and genetic characteristics of 6 children with RRD-HGG.** | | | | | | | | | | |
| --- | --- | --- | --- | --- | --- | --- | --- | --- | --- | --- |
| **Patient ID** | **Tumor location** | **Germline investigations** | | **Tumor investigations** | | | | | | |
| **Genetic findings** | | **Histological diagnosis** | **Immunohistochemistry** | **Methylation** | **NGS** | **WGS** | **TMB (Mut/Mb)** | **TIS** |
| #1 | Left fronto-temporo-parietal | PMS2 | Heterozygous c.2404C>T p.Arg802* | Glioblastoma IDH-wildtype (WHO grade 4) | PMS2 loss  IDH not stated  ATRX not mutated) | Glioblastoma IDH-wildtype, calibration score 0.93 | PMS2 c.2404C>T p.Arg802* Multiple variants detected. | N/A | N/A | N/A |
| #2 | First tumor: left occipital  Second tumor: right frontal  Third tumor: right temporal | PMS2 | Homozygous c.2T>A(;)73C>T | Paediatric HGG (WHO grade 4) | PMS2 loss  MSH6 loss  MSH2 loss  IDH negative  ATRX loss | First tumor: glioblastoma IDH-wild type (calibration score 0.89)  Second tumor: failed (calibration score <0.3)  Third tumor: pediatric-type diffuse HGG RTK1 subtype (calibration score 0.99) | MLH1 c.1896+1G>A  MSH6 c.718C>T  PMS2 c.73C>T  PMS2 c.2T>A.  POLE c.1376C>T.p.(*p.A463D* ; S459F)  TP53 c.844C>T p. Arg282TRP  BRCA2 c.9480_9481insC p.(Lys3161fs) PTEN c.106G>A p.Glu36Arg  PTEN c.697C>T p. Arg233Ter  PTEN c. 1003C>T p.Arg335Ter  NF1 c.8377G>T p. Gly2793Ter | N/A | First tumor: 432.8  Second tumor: 457.1 | First tumor: N/A  Second tumor: 7.11 (Percentile 13.6) |
| #3 | Left frontal | MSH6 | Heterozygous C.3202C>T p.Arg1068* | Glioblastoma IDH-mutant (WHO grade 4) | MSH6 loss  MSH2 loss  IDH1 R132H positive  ATRX retained (not mutated) | Failed to classify the tumor (calibration score 0.18) | IDH1 c.395g>A p.(Arg132HIs)  MSH6 c.3202C>T p(Arg1068*)  TP53 c.817C>T p.(Arg273Cys)  TP53 c.844C>T p.(arg282Trp) | N/A | N/A | N/A |
| #4 | First tumor: right parietal  Second tumor: suprasellar | MLH1 | Heterozygous c.1676T>C;1676= p.[(Leu559Pro)];[(Leu559=)] | Pediatric-HGG/Glioblastoma (WHO grade 4) | MLH1 loss  PMS2 loss  IDH negative  ATRX loss | First tumor: Glioblastoma IDH-wildtype (calibration score 0.34)  Second tumor: Glioblastoma/Paediatric HGG IDH-wildtype RTK1 type (calibration score 1.0) | TP53 c.403del p.Cys135AlafsTer35  ATRX c.3904del p.Arg1302GlufsTer44  EGFR c.2292C>G p.Tyr764Ter  PDGFRA c.1027C>T p.Pro343Ser  TP53 c.159G>A p.Trp53Ter | N/A | First tumor: 58  Second tumor: 56.6 | First tumor: 7.96 (Percentile 52.4)  Second tumor: N/A |
| #5 | Left frontal | MSH6 | Homozygous c.[2653A>T];[2653A>T] p. [(Lys885Ter)];[(Lys885Ter)] | Anaplastic astrocytoma WHO grade 3 | MSH6 loss  MSH2 loss  IDH1 (Arg132His) positive  ATRX loss  TP53 positive | N/A | AKT [NM_001014432.1] c.725G>A; p.Glu242Glu (path)  ERBB2 [NM_004448.3]: c.3508C>G; p.Pro1170Ala (benign) | N/A | 11 | N/A |
| #6 | Spinal | MSH2 | Heterozygous Exon 1-6 deletion | HGG (WHO grade 4) | MLH1 loss  MSH2 loss  MSH6 loss  PMS2 loss  IDH not stated  ATRX retained (not mutated) | Pediatric-type diffuse HGG, RTK1 subtype, subclass A (calibration score 0.99) | MLH1 c.694G>A p. Gly232Arg  ATM c.849dup p- Gln284fs  BRCA2 c.6025C>T p. Gln2009Ter  BRCA2 c.8773C>T p. Gln2925Ter  NF1 c.2251G>T p. (Gly751Ter)  TP53 c.743G>A p. Arg248Gln  TP53 c.1101-1G>T  PIK3CA c.1638G>T p. Gln546His  MSH2 c.1301C>T p. Ala434Val  PMS2 c.2404C>T p.Arg802*  Multiple variants detected (hypermutant) | POLE c.641BG>A p.Glu2140Lys | 307.69 | 8.49 (Percentile 70.9) |
| HGG: high-grade glioma, N/A: not available, NGS: next generation sequencing, NOS: not otherwise specified, RRD: replication repair deficiency, TIS: Tumor inflammation signature done by nanostring immune assay; TMB: tumor mutational burden, WGS: whole genome sequencing, WHO: world health organization. | | | | | | | | | | |
